# Supplementary material for: Monolayer Bi2Se3−xTex: novel two-dimensional semiconductors with excellent stability and high electron mobility
Source: Royal Society of Chemistry journal article supplement (doi:10.1039/d0cp00729c), 2020-01-01
Supplement: d0cp00729c1.pdf [file d0cp00729c1.pdf]

## Supplementary Information for Monolayer $\text{Bi}_2\text{Se}_{3-x}\text{Te}_x$ : novel two-dimensional semiconductors with excellent stability and high electron mobility

Yifan Liu <sup>a,‡</sup>, Yuanfeng Xu <sup>a,‡,\*</sup>, Yanju Ji <sup>a</sup>, Hao Zhang <sup>b,\*</sup>

<sup>a</sup> *School of Science, Shandong Jianzhu University, Jinan 250101, Shandong, China*

<sup>b</sup> *Key Laboratory for Information Science of Electromagnetic Waves (MoE),*

*Key Laboratory of Micro and Nano Photonic Structures  
(MoE) and Department of Optical Science and Engineering,  
Fudan University, Shanghai 200433, China*

*Correspondence: xuyuanfeng19@sdjzu.edu.cn*

*(Yf. Xu); zhangh@fudan.edu.cn (H. Zhang) and*

*‡ These authors contributed equally to this work.*

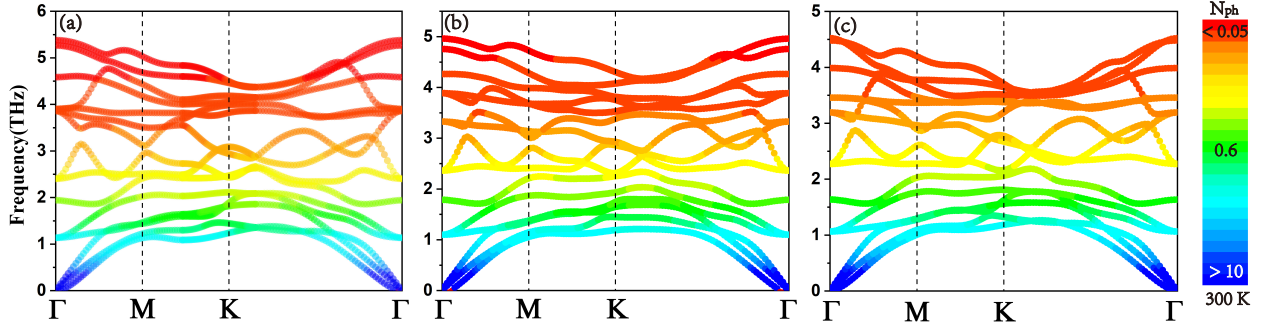

FIG. S1: Phonon dispersion of monolayer (a)  $\text{Bi}_2\text{Se}_3$ , (b)  $\text{Bi}_2\text{Se}_2\text{Te}$  and (c)  $\text{Bi}_2\text{SeTe}_2$ , respectively. The phonon occupation number is determined from the Bose-Einstein distribution function at 300 K.

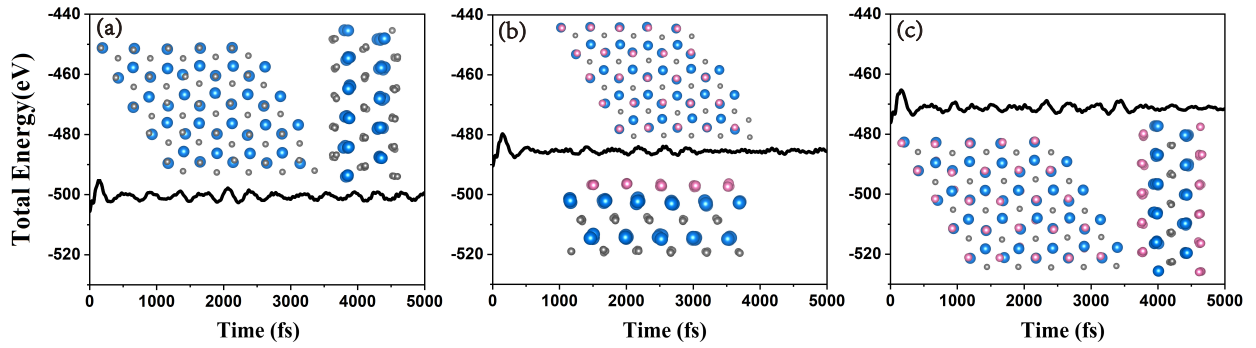

FIG. S2: The AIMD calculations with the total simulation time of 5 ps and an interval of 1 fs of (a)  $\text{Bi}_2\text{Se}_3$ , (b)  $\text{Bi}_2\text{Se}_2\text{Te}$  and (c)  $\text{Bi}_2\text{SeTe}_2$  at  $T = 300$  K. Inserted are the final structures of three monolayer materials from top view and side view.

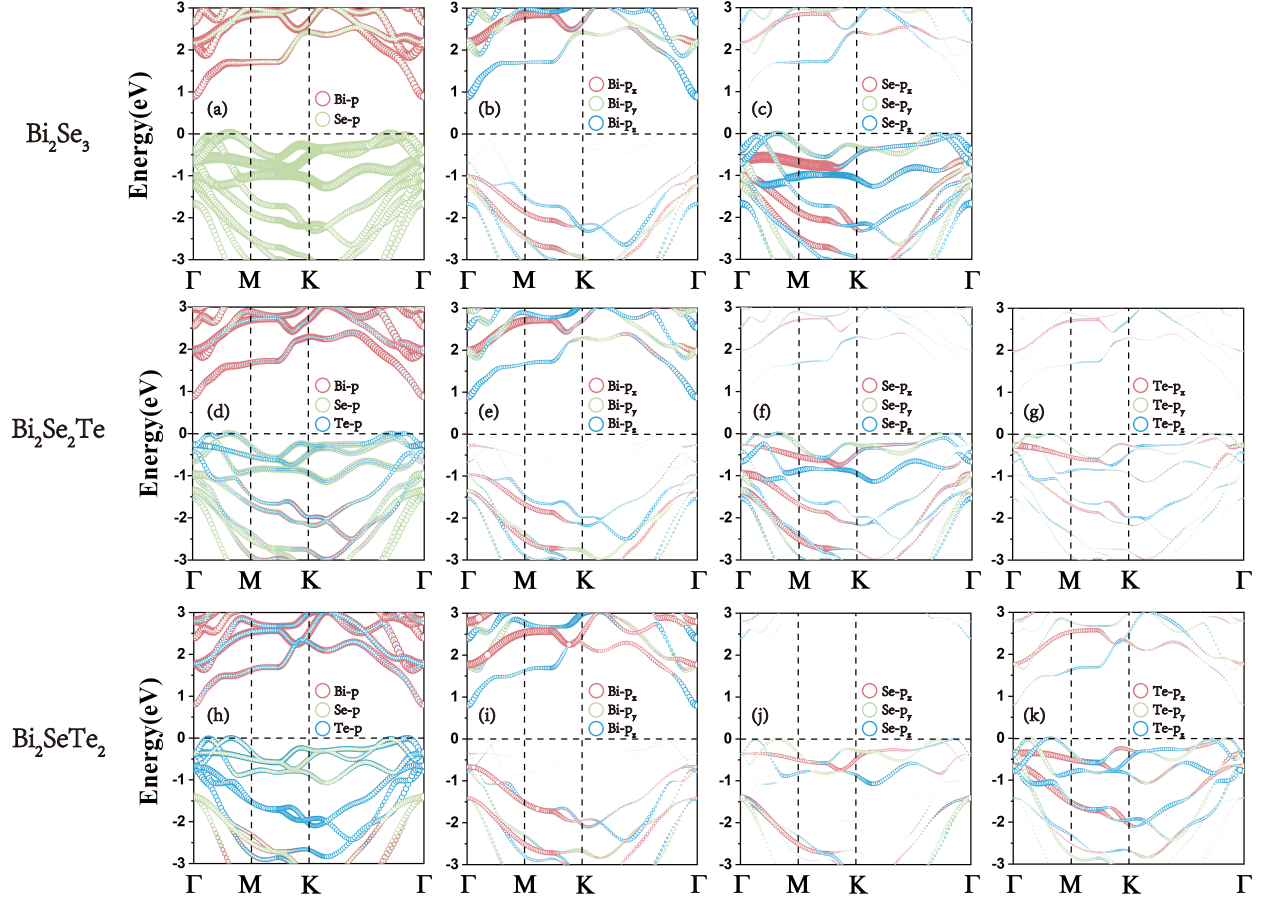

FIG. S3: The site and orbital-projected band structure of monolayer  $\text{Bi}_2\text{Se}_3$  (a-c),  $\text{Bi}_2\text{Se}_2\text{Te}$  (d-g) and  $\text{Bi}_2\text{SeTe}_2$  (h-k). The red, green and blue circles represent  $p$  orbitals of Bi, Se and Te atoms in (a,d,h), while represent  $p_x$ ,  $p_y$  and  $p_z$  orbitals in the rest of the diagram.

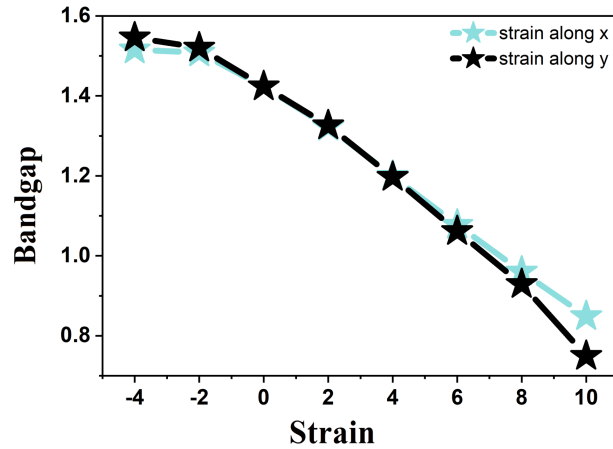

FIG. S4: HSE calculations of the evolution of band gaps for monolayer  $\text{Bi}_2\text{Se}_3$  as a function of the applied uniaxial strain along the  $a$  and  $b$  direction.

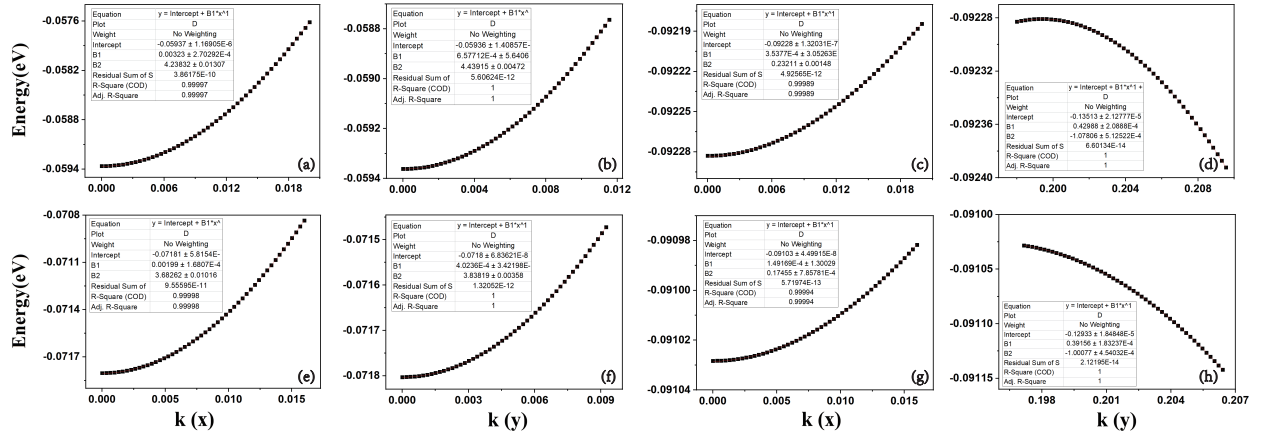

FIG. S5: The  $m^*$  fitting diagram of  $\text{Bi}_2\text{Se}_3$  calculations of PBE in electron (a,b) and hole (c,d), PBE+SOC in electron (e,f) and hole (g,h). The inserted table is the data for the fitting curve.

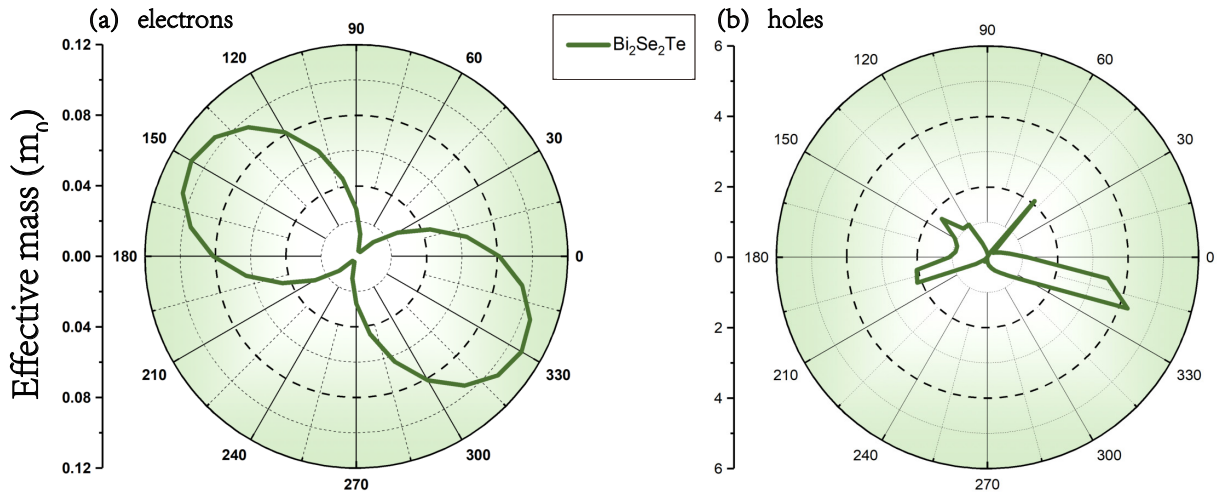

FIG. S6: Angular dependence on the effective masses of (a) electrons and (b) holes for monolayer  $\text{Bi}_2\text{Se}_2\text{Te}$ .
